# Supplementary material
Source: Springer Nature journal article supplement (https://www.springermedizin.de/resource/supplementary/12916_2011_480_MOESM6_ESM.pdf/9599776)

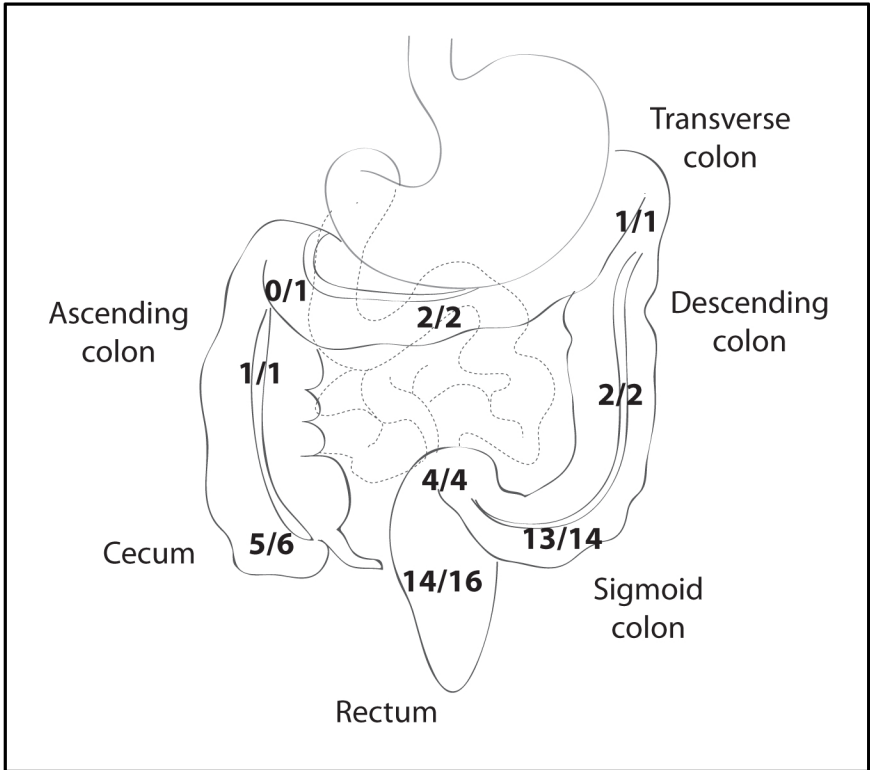

Supplement: MOESM6 [file 9599776]
